# Supplementary material for: Simultaneous copy number gains of NUPR1 and ERBB2 predicting poor prognosis in early-stage breast cancer
Source: PubMed Central journal article supplement (PMC3489802; doi:10.1186/1471-2407-12-382), 2012-08-31
Supplement: 1471-2407-12-382-S1.pdf [file 1471-2407-12-382-S1.pdf]

## Additional Data

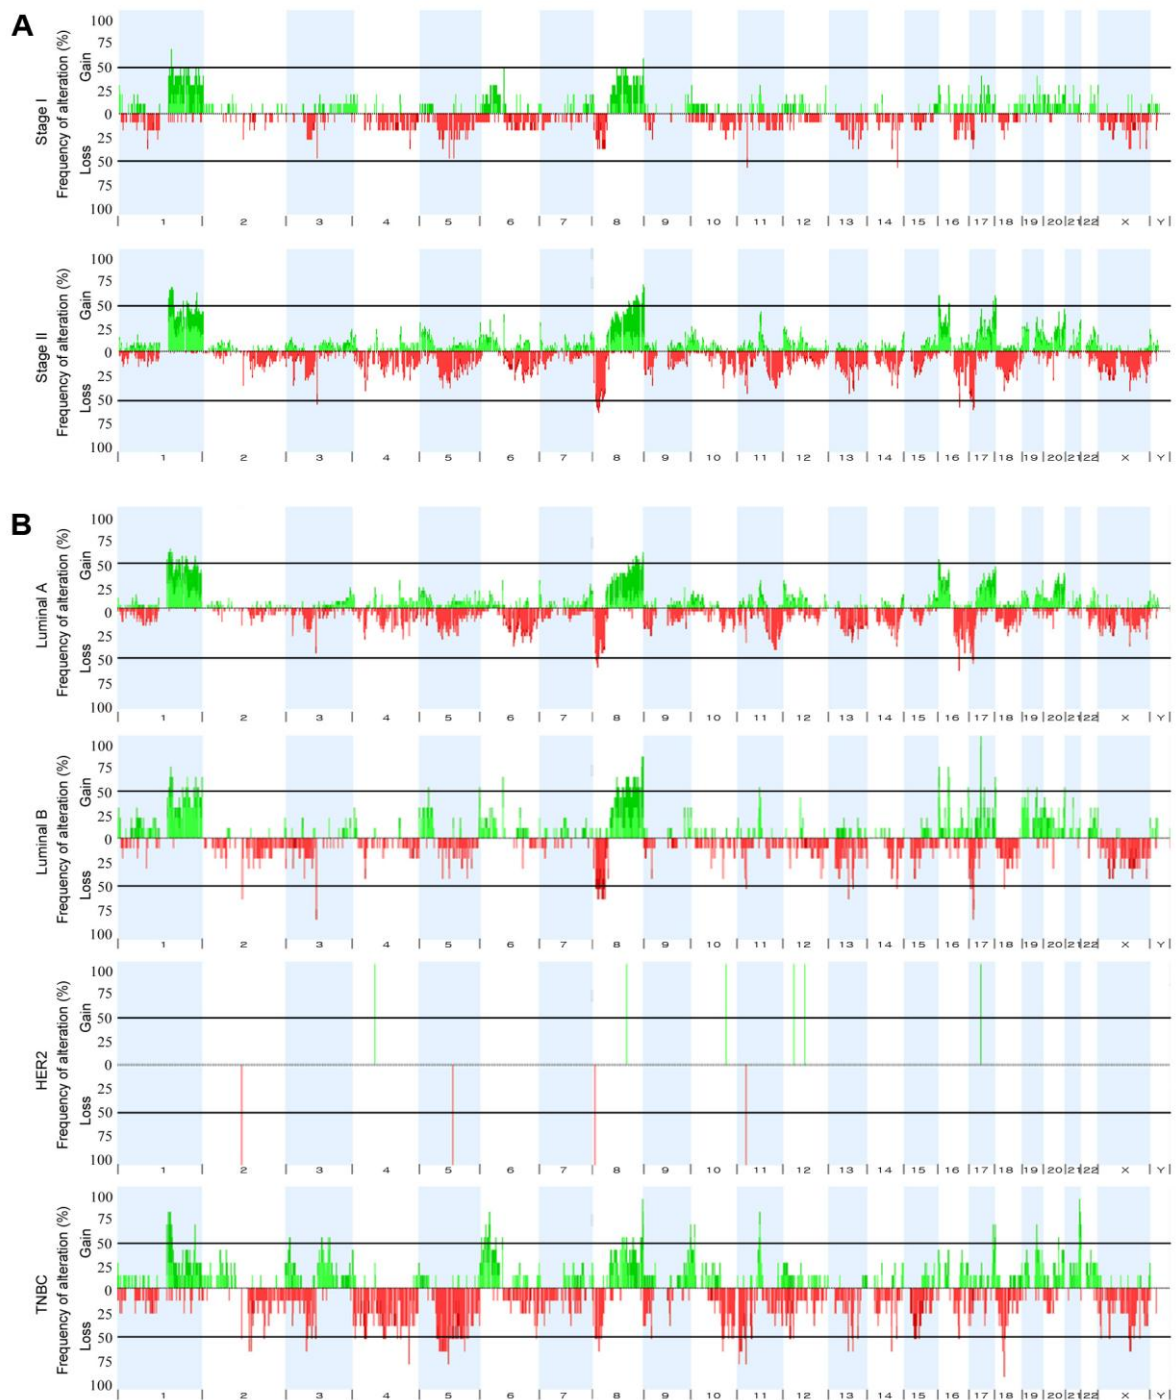

**Figure S1.** Genome-wide frequency plots of chromosomal alterations for each breast cancer subtype. (A) Frequencies of copy number gains and losses in Stage I (n=11) and II (n=37) breast cancers. (B) Frequencies of copy number gains and losses in Luminal A (n=29), Luminal B (n=10), HER2 (n=1), and TNBC (n=8). Green bars denote copy number gains and red bars copy number losses. Boundaries of individual chromosomes are indicated by the vertical bars.

**Table S1.** Primer sequences for target and diploid control regions

| Target Region             | Forward Primer (5' – 3') | Reverse Primer (5' – 3') |
|---------------------------|--------------------------|--------------------------|
| RAR-G12 ( <i>NUPRI</i> )  | AGCTTCTCTCTTGGTGCGACCTTT | ATCATGCCTATGCCCACTTCACCT |
| RAR-G13 ( <i>ERBB2</i> )  | TGAGGGCAGTTACCAGTGCCAATA | ATCGTGCCCACTCTTACCCATCAA |
| Diploid control (13q32.1) | CGTACCACCACACCAAGCAG     | CCACCTGGCTGTTGTAGTCCTC   |

**Table S2.** Copy number alterations significantly more frequent in stage II than in stage I

| Region (Mb)       | Cytoband      | Event | Frequency (Stage I, %) | Frequency (Stage II, %) | <i>P</i> -Value | FDR |
|-------------------|---------------|-------|------------------------|-------------------------|-----------------|-----|
| chr16:3.61-3.65   | p13.3         | Gain  | 0                      | 37.8                    | 0.021           | 1   |
| chr16:3.65-4.21   | p13.3         | Gain  | 0                      | 35.1                    | 0.023           | 1   |
| chr16:19.12-19.62 | p12.3         | Gain  | 0                      | 32.4                    | 0.044           | 1   |
| chr16:19.62-20.42 | p12.3         | Gain  | 0                      | 35.1                    | 0.023           | 1   |
| chr16:20.42-20.58 | p12.3 - p12.2 | Gain  | 0                      | 32.4                    | 0.044           | 1   |
| chr16:20.58-20.65 | p12.2         | Gain  | 0                      | 29.7                    | 0.048           | 1   |
| chr16:27.36-27.72 | p12.1 - p11.2 | Gain  | 0                      | 29.7                    | 0.048           | 1   |
| chr16:60.23-60.24 | q21           | Loss  | 18.2                   | 56.8                    | 0.039           | 1   |
| chr17:0.62-0.64   | p13.3         | Loss  | 0                      | 40.5                    | 0.01            | 1   |
| chr17:0.64-0.70   | p13.3         | Loss  | 0                      | 37.8                    | 0.021           | 1   |
| chr17:0.70-0.80   | p13.3         | Loss  | 0                      | 35.1                    | 0.023           | 1   |
| chr17:15.07-15.33 | p12           | Loss  | 0                      | 32.4                    | 0.044           | 1   |
| chr17:15.33-15.34 | p12           | Loss  | 0                      | 29.7                    | 0.048           | 1   |
| chr17:70.75-71.18 | q25.1         | Gain  | 9.1                    | 45.9                    | 0.035           | 1   |
| chr17:71.18-71.20 | q25.1         | Gain  | 9.1                    | 48.6                    | 0.032           | 1   |
| chr17:71.20-71.21 | q25.1         | Gain  | 9.1                    | 45.9                    | 0.035           | 1   |
| chr17:71.23-71.32 | q25.1         | Gain  | 0                      | 43.2                    | 0.009           | 1   |
| chr17:71.32-71.85 | q25.1         | Gain  | 0                      | 40.5                    | 0.01            | 1   |
| chr17:76.00-76.57 | q25.3         | Gain  | 0                      | 35.1                    | 0.023           | 1   |
| chr17:76.87-76.89 | q25.3         | Gain  | 9.1                    | 45.9                    | 0.035           | 1   |
| chr17:76.89-76.93 | q25.3         | Gain  | 9.1                    | 48.6                    | 0.032           | 1   |
| chr17:76.93-77.01 | q25.3         | Gain  | 9.1                    | 51.4                    | 0.016           | 1   |
| chr17:77.01-77.08 | q25.3         | Gain  | 18.2                   | 54.1                    | 0.045           | 1   |
| chr17:77.44-77.58 | q25.3         | Gain  | 9.1                    | 45.9                    | 0.035           | 1   |
| chr17:77.58-77.59 | q25.3         | Gain  | 9.1                    | 48.6                    | 0.032           | 1   |
| chr17:77.59-78.20 | q25.3         | Gain  | 9.1                    | 51.4                    | 0.016           | 1   |
| chr17:78.20-78.24 | q25.3         | Gain  | 9.1                    | 48.6                    | 0.032           | 1   |
| chr17:78.24-78.77 | q25.3         | Gain  | 9.1                    | 51.4                    | 0.016           | 1   |
| chr20:28.12-28.13 | q11.1         | Loss  | 0                      | 29.7                    | 0.048           | 1   |

**Table S3.** High copy number changes in the discovery set of early breast cancers

| Changes | Cytoband   | Portion (Mb)  | Size (Mb) | Number of case | Observed cases                                | Putative cancer-related genes                   | DGV* | Korean CNV <sup>†</sup> |
|---------|------------|---------------|-----------|----------------|-----------------------------------------------|-------------------------------------------------|------|-------------------------|
| Amp1    | 1p36.33    | 1.18-1.26     | 0.08      | 1              | BRC104                                        |                                                 | yes  | no                      |
| Amp2    | 1p35.2-p34 | 31.75-32.15   | 0.40      | 1              | BRC62                                         |                                                 | yes  | no                      |
| Amp3    | 1p34.2-p33 | 43.22-44.24   | 1.02      | 1              | BRC62                                         | MPL, CDC20, PTPRF, ST3GAL3, ATP6V0B, B4GALT2    | yes  | yes                     |
| Amp4    | 1p33       | 50.20-50.71   | 0.51      | 1              | BRC104                                        |                                                 | yes  | yes                     |
| Amp5    | 1p12-p11.2 | 119.63-120.96 | 1.33      | 2              | BRC88, 104                                    | HSD3B2, HSD3B1, REG4, NOTCH2                    | yes  | yes                     |
| Amp6    | 1q21.1     | 144.15-144.40 | 0.25      | 1              | BRC110                                        | TXNIP, PIAS3                                    | yes  | yes                     |
| Amp7    | 1q21.2     | 148.40-149.41 | 1.01      | 1              | BRC98                                         | PLEKHO1, ARNT, CTSK, LASS2, MCL1, PRUNE, SETDB1 | yes  | no                      |
| Amp8    | 1q21.3     | 150.01-150.05 | 0.04      | 1              | BRC110                                        |                                                 | yes  | no                      |
| Amp9    | 1q21.3     | 150.82-150.93 | 0.11      | 9              | BRC98, 104, 117, 130, 145, 157, 175, 182, 185 |                                                 | yes  | yes                     |
| Amp10   | 1q21.3     | 152.45-152.51 | 0.07      | 1              | BRC110                                        |                                                 | yes  | no                      |
| Amp11   | 1q21.3     | 153.16-153.31 | 0.14      | 1              | BRC98                                         | PYGO2, SHC1, CKS1B, ADAM15                      | yes  | no                      |
| Amp12   | 1q22       | 153.50-154.31 | 0.81      | 1              | BRC98                                         | FDPS, YY1API, DAP3, ARHGEF2, RAB25              | yes  | no                      |
| Amp13   | 1q22       | 154.53-155.05 | 0.52      | 1              | BRC98                                         | VHLL, MEF2D, NES, CRABP2, PRCC, CCT3            | yes  | no                      |
| Amp14   | 1q23.1     | 156.42-157.18 | 0.76      | 1              | BRC110                                        | CD1D, PYHIN1                                    | yes  | yes                     |
| Amp15   | 1q23.3     | 159.40-159.41 | 0.01      | 1              | BRC106                                        |                                                 | yes  | no                      |
| Amp16   | 1q23.3     | 160.61-160.76 | 0.15      | 1              | BRC110                                        |                                                 | yes  | no                      |
| Amp17   | 1q24.1     | 165.09-165.54 | 0.45      | 1              | BRC110                                        | POU2F1                                          | yes  | no                      |
| Amp18   | 1q24.2     | 167.03-167.75 | 0.72      | 1              | BRC110                                        |                                                 | yes  | yes                     |
| Amp19   | 1q32.2     | 206.03-206.27 | 0.24      | 1              | BRC148                                        | CD46, CD34                                      | yes  | no                      |
| Amp20   | 1q32.2     | 208.03-208.41 | 0.38      | 1              | BRC148                                        |                                                 | yes  | yes                     |
| Amp21   | 1q42.12    | 223.16-223.40 | 0.24      | 1              | BRC98                                         |                                                 | yes  | no                      |
| Amp22   | 1q42.12    | 224.34-224.98 | 0.64      | 1              | BRC98                                         | PARP1                                           | yes  | no                      |
| Amp23   | 1q42.13    | 225.95-226.44 | 0.48      | 2              | BRC98, 179                                    | WNT9A, WNT3A, ARF1                              | yes  | no                      |
| Amp24   | 1q42.2     | 227.86-229.54 | 1.67      | 2              | BRC88, 179                                    | AGT, CAPN9                                      | yes  | no                      |
| Amp25   | 1q42.2     | 229.56-231.19 | 1.63      | 1              | BRC88                                         | EGLN1                                           | yes  | yes                     |
| Amp26   | 1q43       | 231.87-235.13 | 3.25      | 1              | BRC88                                         | ARID4B, B3GALNT2, NID1, LGALS8, MTR             | yes  | yes                     |
| Amp27   | 1q43       | 236.12-239.57 | 3.46      | 1              | BRC88                                         | RGS7                                            | yes  | yes                     |
| Amp28   | 1q43       | 239.74-241.73 | 1.99      | 1              | BRC88                                         | FH, EXO1, SDCCAG8, AKT3                         | yes  | no                      |
| Amp29   | 1q44       | 242.30-244.09 | 1.79      | 1              | BRC88                                         | SMYD3                                           | yes  | no                      |
| Amp30   | 1q44       | 245.04-247.07 | 2.03      | 1              | BRC88                                         |                                                 | yes  | yes                     |
| Amp31   | 2p21       | 42.01-42.51   | 0.49      | 1              | BRC87                                         | COX7A2L                                         | yes  | no                      |
| Amp32   | 2p21p      | 46.27-46.84   | 0.58      | 1              | BRC87                                         | PRKC, EPAS1                                     | yes  | yes                     |
| Amp33   | 2p16.3     | 48.46-48.86   | 0.40      | 1              | BRC87                                         | LHCGR                                           | yes  | yes                     |
| Amp34   | 2q11.2     | 95.18-96.84   | 1.66      | 1              | BRC110                                        | STARD7                                          | yes  | yes                     |
| Amp35   | 2q24.2     | 160.12-160.37 | 0.25      | 1              | BRC87                                         |                                                 | yes  | no                      |
| Amp36   | 2q33.1     | 196.31-200.89 | 4.58      | 1              | BRC87                                         | HSPD1, HSPE1                                    | yes  | yes                     |
| Amp37   | 2q33.3     | 206.73-206.88 | 0.15      | 2              | BRC96, 131                                    |                                                 | yes  | no                      |
| Amp38   | 5p15.3     | 0.21-1.99     | 1.78      | 1              | BRC74                                         | AHRR, SLC9A3, TPPP, ZDHHC11, SLC12A7, TERT      | no   | yes                     |
| Amp39   | 5p15.33    | 3.47-3.65     | 0.18      | 1              | BRRC74                                        |                                                 | no   | no                      |
| Amp40   | 5p13.2     | 37.10-37.26   | 0.16      | 1              | BRC120                                        | NIPBL                                           | no   | no                      |
| Amp41   | 5q35.3     | 175.70-176.97 | 1.26      | 2              | BRC96, 104                                    | ARL10, UNC5A, FGFR4, RAB24                      | yes  | no                      |
| Amp42   | 6p21.3     | 26.13-26.14   | 0.01      | 1              | BRC189                                        |                                                 | yes  | no                      |

|       |          |               |       |   |                                             |                                                                          |     |     |
|-------|----------|---------------|-------|---|---------------------------------------------|--------------------------------------------------------------------------|-----|-----|
| Amp43 | 6p21.3   | 26.21-26.35   | 0.14  | 1 | BRC189                                      |                                                                          | yes | no  |
| Amp44 | 6q21     | 106.66-112.78 | 6.11  | 1 | BRC120                                      | AMD1, CD164, FYN, LAMA4, PDSS2, PRDM1, TRAF3IP2, WISP3                   | yes | yes |
| Amp45 | 7p14.3   | 32.87-33.80   | 0.93  | 1 | BRC74                                       |                                                                          | no  | yes |
| Amp46 | 7p14.2   | 35.64-35.84   | 0.20  | 1 | BRC74                                       |                                                                          | yes | no  |
| Amp47 | 7q32.2   | 129.21-129.56 | 0.35  | 1 | BRC110                                      |                                                                          | yes | no  |
| Amp48 | 8p23.1   | 10.38-10.57   | 0.19  | 1 | BRC120                                      |                                                                          | yes | no  |
| Amp49 | 8p11.2   | 36.91-40.15   | 3.24  | 2 | BRC66, 74                                   | GPR124, ADRB3, EIF4EBP1, LSM1, BAG4, FGFR1, TACC1, ADAM9, INDO           | yes | yes |
| Amp50 | 8q11.23  | 55.54-55.71   | 0.16  | 1 | BRC157                                      |                                                                          | yes | no  |
| Amp51 | 8q12.1   | 56.10-57.29   | 1.19  | 1 | BRC76                                       | LYN, PLAG1                                                               | yes | no  |
| Amp52 | 8q12.3   | 64.10-64.46   | 0.36  | 2 | BRC76, 157                                  |                                                                          | yes | no  |
| Amp53 | 8q13     | 66.80-67.25   | 0.45  | 1 | BRC82                                       | CRH                                                                      | yes | no  |
| Amp54 | 8q13     | 67.75-68.04   | 0.28  | 1 | BRC82                                       | PTTG3                                                                    | yes | no  |
| Amp55 | 8q21.11  | 73.45-79.74   | 6.30  | 2 | BRC76, 189                                  | TERF1, TCEB1                                                             | yes | yes |
| Amp56 | 8q21.13  | 80.99-86.31   | 5.32  | 2 | BRC76, 189                                  | TPD52, E2F5                                                              | yes | yes |
| Amp57 | 8q21.3   | 87.13-92.16   | 5.03  | 1 | BRC76                                       | WWP1, MMP16, NBN                                                         | yes | yes |
| Amp58 | 8q22     | 94.80-97.31   | 2.52  | 3 | BRC76, 179, 189                             | CDH17, RAD54B, CCNE2, TP53INP1                                           | yes | yes |
| Amp59 | 8q22     | 97.69-99.20   | 1.51  | 3 | BRC76, 179, 189                             | SDC2, MTDH, LAPTM4B                                                      | yes | yes |
| Amp60 | 8q23.1   | 101.78-108.33 | 6.56  | 6 | BRC76, 82, 88, 98, 179, 189                 | PABPC1, YWHAZ, RRM2B, KLF10, ATP6V1C1, CTHRC1, RIMS2, LRP12, ANGPT1      | yes | yes |
| Amp61 | 8q23.3   | 109.34-113.30 | 3.96  | 2 | BRC76, 189                                  | NUDCD1, EBAG9                                                            | yes | yes |
| Amp62 | 8q24.11  | 116.49-117.93 | 1.44  | 1 | BRC189                                      | TRPS1, RAD21                                                             | yes | yes |
| Amp63 | 8q24.11  | 119.17-119.38 | 0.22  | 1 | BRC76                                       | EXT1                                                                     | yes | yes |
| Amp64 | 8q24.22  | 120.51-135.87 | 15.37 | 9 | BRC76, 82, 88, 104, 110, 130, 157, 182, 189 | DDEF1, ENPP2, FAM83A, FAM84B, HAS2, MTSS1, MYC, NDRG1, RNF139, TG, WISP1 | yes | yes |
| Amp65 | 8q24.23  | 139.22-139.52 | 0.29  | 1 | BRC82                                       |                                                                          | yes | no  |
| Amp66 | 8q24.3   | 142.30-143.85 | 1.55  | 4 | BRC82, 117, 120, 157                        | PTP4A3, BAI1, ARC, PSCA, LY6K, LYNX1                                     | yes | no  |
| Amp67 | 8q24.3   | 144.37-145.55 | 1.18  | 5 | BRC82, 117, 120, 157, 189                   | SCRIB, PLEC1, HSF1                                                       | yes | yes |
| Amp68 | 8q24.3   | 145.59-145.72 | 0.13  | 2 | BRC82, 157                                  | SLC39A4, VPS28                                                           | yes | no  |
| Amp69 | 8q24.3   | 145.92-146.04 | 0.12  | 2 | BRC82, 157                                  |                                                                          | yes | no  |
| Amp70 | 9p24     | 2.41-2.64     | 0.23  | 1 | BRC189                                      |                                                                          | yes | yes |
| Amp71 | 9q13     | 70.33-71.24   | 0.90  | 1 | BRC104                                      | FXN                                                                      | yes | yes |
| Amp72 | 9q33.2   | 123.10-124.13 | 1.02  | 1 | BRC110                                      | GSN, DAB2IP, LHX6                                                        | yes | no  |
| Amp73 | 9q33.2   | 124.42-124.66 | 0.24  | 1 | BRC110                                      |                                                                          | yes | no  |
| Amp74 | 9q33.3   | 125.23-126.07 | 0.85  | 1 | BRC110                                      |                                                                          | yes | yes |
| Amp75 | 9q33.3   | 126.28-126.80 | 0.51  | 1 | BRC110                                      |                                                                          | yes | no  |
| Amp76 | 9q33.3   | 127.04-128.64 | 1.60  | 1 | BRC110                                      | HSPA5                                                                    | yes | yes |
| Amp77 | 10q11.21 | 43.46-43.80   | 0.34  | 1 | BRC64                                       |                                                                          | no  | no  |
| Amp78 | 10q22.1  | 72.31-72.79   | 0.48  | 1 | BRC110                                      | UNC5B                                                                    | yes | no  |
| Amp79 | 10q22.2  | 76.87-76.92   | 0.05  | 1 | BRC110                                      |                                                                          | yes | no  |
| Amp80 | 10q22.3  | 79.78-80.75   | 0.96  | 1 | BRC148                                      |                                                                          | yes | no  |
| Amp81 | 11p13    | 31.39-32.08   | 0.69  | 1 | BRC106                                      |                                                                          | no  | yes |
| Amp82 | 11q12.2  | 59.33-60.32   | 1.00  | 1 | BRC74                                       | MS4A1                                                                    | yes | yes |
| Amp83 | 11q13    | 67.69-68.14   | 0.45  | 1 | BRC106                                      |                                                                          | yes | no  |
| Amp84 | 11q13.3  | 68.5-69.99    | 1.49  | 3 | BRC76, 99, 106                              | MYEOV, CCND1, ORAOV1, FGF19, FGF4, FGF3, TMEM16A, FADD, CTTN             | yes | no  |
| Amp85 | 11q13.4  | 70.96-71.39   | 0.43  | 2 | BRC57, 58                                   | NUMA1                                                                    | yes | no  |
| Amp86 | 11q13.5  | 72.62-72.69   | 0.07  | 1 | BRC106                                      | P2RY2, P2RY6                                                             | yes | no  |
| Amp87 | 11q14.1  | 73.25-82.12   | 8.87  | 1 | BRC74, 106                                  | ARRB1, CHRDL2, NEU3, PAK1, RPS3, RSF1,                                   | yes | yes |

|        |          |               |      |    |                                                                 |                                                                                                                                            |     |     |
|--------|----------|---------------|------|----|-----------------------------------------------------------------|--------------------------------------------------------------------------------------------------------------------------------------------|-----|-----|
| Amp88  | 11q14.1  | 82.63-85.08   | 2.45 | 1  | BRC106                                                          | THRSP, UVRAG                                                                                                                               |     |     |
| Amp89  | 12p13    | 6.73-6.76     | 0.03 | 1  | BRC130                                                          | SYTL2                                                                                                                                      | yes | yes |
| Amp90  | 12p13.2  | 10.11-10.2    | 0.09 | 1  | BRC148                                                          | PTMS                                                                                                                                       | yes | no  |
| Amp91  | 12p11.21 | 28.63-31.07   | 2.44 | 1  | BRC148                                                          | ERGIC2                                                                                                                                     | yes | yes |
| Amp92  | 12q12    | 44.11-44.40   | 0.29 | 1  | BRC88                                                           |                                                                                                                                            | yes | no  |
| Amp93  | 12q14.1  | 62.87-63.18   | 0.31 | 1  | BRC74                                                           | TBK1                                                                                                                                       | yes | no  |
| Amp94  | 12q14.3  | 64.14-64.51   | 0.36 | 1  | BRC74                                                           | HMGA2                                                                                                                                      | yes | yes |
| Amp95  | 12q21.1  | 66.34-70.71   | 4.37 | 1  | BRC74                                                           | IFNG, SLC35E3, MDM2, YEATS4, PTPRB, TSPAN8, LGR5                                                                                           | yes | yes |
| Amp96  | 13q12    | 22.45-23.20   | 0.75 | 1  | BRC96                                                           |                                                                                                                                            | no  | no  |
| Amp97  | 13q12.2  | 26.23-27.77   | 1.55 | 1  | BRC96                                                           | RASL11A, CDX2, FLT3, FLT1                                                                                                                  | no  | yes |
| Amp98  | 13q13.1  | 31.87-31.98   | 0.10 | 1  | BRC96                                                           |                                                                                                                                            | no  | no  |
| Amp99  | 13q14.11 | 37.11-44.41   | 7.30 | 1  | BRC96                                                           | TNFSF11, DNAJC15, TSC22D1                                                                                                                  | no  | yes |
| Amp100 | 13q14.3  | 50.02-51.89   | 1.87 | 1  | BRC178                                                          | INTS6, NEK3                                                                                                                                | no  | yes |
| Amp101 | 13q22.1  | 73.73-74.03   | 0.30 | 1  | BRC178                                                          |                                                                                                                                            | no  | yes |
| Amp102 | 13q31.1  | 78.83-79.03   | 0.20 | 1  | BRC178                                                          |                                                                                                                                            | no  | no  |
| Amp103 | 14q23.3  | 62.72-74.47   | 1.75 | 1  | BRC114                                                          | ESR2, HSPA2                                                                                                                                | no  | yes |
| Amp104 | 14q31.3  | 87.67-87.72   | 0.04 | 1  | BRC96                                                           |                                                                                                                                            | no  | no  |
| Amp105 | 14q32    | 100.27-100.37 | 0.10 | 1  | BRC188                                                          | MEG3                                                                                                                                       | no  | no  |
| Amp106 | 15q24.1  | 71.82-71.97   | 0.15 | 3  | BRC66, 130, 145                                                 |                                                                                                                                            | no  | no  |
| Amp107 | 16p13.3  | 0.56-0.71     | 0.16 | 3  | BRC82, 104, 157                                                 | STUB1, RHOT2                                                                                                                               | yes | no  |
| Amp108 | 16p13.3  | 1.76-1.77     | 0.01 | 1  | BRC82                                                           |                                                                                                                                            | yes | no  |
| Amp109 | 16p13.3  | 2.50-2.61     | 0.11 | 1  | BRC157                                                          | PDPK1                                                                                                                                      | yes | yes |
| Amp110 | 16p13.3  | 2.84-2.94     | 0.10 | 1  | BRC82                                                           |                                                                                                                                            | yes | no  |
| Amp111 | 16p13.13 | 11.25-11.68   | 0.43 | 1  | BRC104                                                          | SOCS1, PRM2, LITAF                                                                                                                         | yes | yes |
| Amp112 | 16p13.1  | 15.59-16.16   | 0.58 | 1  | BRC104                                                          | ABCC1                                                                                                                                      | yes | yes |
| Amp113 | 16p11    | 28.40-28.42   | 0.02 | 6  | BRC64, 74, 82, 96, 157, 179                                     |                                                                                                                                            | yes | no  |
| Amp114 | 16q22.1  | 69.27-69.32   | 0.05 | 1  | BRC64                                                           |                                                                                                                                            | yes | no  |
| Amp115 | 16q22.1  | 70.62-70.70   | 0.08 | 1  | BRC64                                                           | HP                                                                                                                                         | yes | no  |
| Amp116 | 16q22.3  | 71.20-71.38   | 0.18 | 1  | BRC64                                                           |                                                                                                                                            | yes | no  |
| Amp117 | 17p11.2  | 19.18-20.78   | 1.60 | 1  | BRC120                                                          | MAPK7                                                                                                                                      | yes | no  |
| Amp118 | 17p11.2  | 27.72-27.75   | 0.03 | 1  | BRC178                                                          |                                                                                                                                            | no  | no  |
| Amp119 | 17q21.2  | 32.42-35.87   | 3.45 | 14 | BRC57, 59, 62, 64, 66, 76, 96, 99, 104, 114, 120, 178, 179, 189 | AATF, ACACA, CDC6, CSF3, ERBB2, FBXO47, GRB7, IGFBP4, LASP1, PCGF2, PERLD1, PLXDC1, PNMT, PPP1R1B, RARA, RPL19, RPL23, TBC1D3, THRA, TOP2A | yes | no  |
| Amp120 | 17q21.2  | 36.99-37.26   | 0.27 | 1  | BRC64                                                           | KRT17, GAST, JUP                                                                                                                           | yes | yes |
| Amp121 | 17q21.31 | 38.53-38.71   | 0.18 | 1  | BRC178                                                          | NBR2, NBR1                                                                                                                                 | yes | no  |
| Amp122 | 17q21.33 | 44.40-45.91   | 1.51 | 2  | BRC178, 189                                                     | IGF2BP1, ABI3, PHB, NGFR, ITGA3, COL1A1                                                                                                    | yes | no  |
| Amp123 | 17q23.2  | 54.42-55.88   | 1.46 | 1  | BRC64                                                           | TRIM37, RPS6KB1, APPBP2                                                                                                                    | yes | yes |
| Amp124 | 17q24.1  | 57.38-60.21   | 2.83 | 2  | BRC64, 74                                                       | ACE, GH1, ERN1, PECAM1, DDX5, ICAM2                                                                                                        | yes | yes |
| Amp125 | 17q24.2  | 63.42-64.05   | 0.63 | 1  | BRC74                                                           | KPNA2, PRKAR1A                                                                                                                             | no  | yes |
| Amp126 | 17q25.1  | 69.95-71.31   | 1.36 | 2  | BRC178, 189                                                     | SLC9A3R1, GRB2, ITGB4                                                                                                                      | yes | no  |
| Amp127 | 17q25.2  | 71.90-72.24   | 0.34 | 1  | BRC189                                                          | CYGB, ST6GALNAC1                                                                                                                           | yes | no  |
| Amp128 | 17q25.3  | 73.67-74.36   | 0.69 | 1  | BRC189                                                          | TK1, BIRC5, EPR1, SOCS3, TIMP2                                                                                                             | yes | no  |
| Amp129 | 18q12.3  | 41.52-41.73   | 0.22 | 1  | BRC98                                                           |                                                                                                                                            | yes | no  |
| Amp130 | 18q22.2  | 64.87-65.66   | 0.79 | 8  | BRC58, 88, 117, 118, 133, 175, 185, 188                         |                                                                                                                                            | yes | yes |
| Amp131 | 19p13.3  | 0.85-0.92     | 0.08 | 2  | BRC82, 148                                                      | KISS1R                                                                                                                                     | no  | no  |

|        |          |               |      |   |                 |                                                        |     |     |
|--------|----------|---------------|------|---|-----------------|--------------------------------------------------------|-----|-----|
| Amp132 | 19p13.3  | 1.73-1.80     | 0.07 | 2 | BRC96, 157      |                                                        | no  | no  |
| Amp133 | 19p13.3  | 1.93-1.94     | 0.01 | 2 | BRC157, 189     |                                                        | no  | no  |
| Amp134 | 19q12    | 34.19-35.10   | 0.91 | 1 | BRC96           | UQCRFS1, CCNE1                                         | yes | no  |
| Amp135 | 19q13.13 | 43.15-44.48   | 1.33 | 1 | BRC96           | PPP1R14A, SPINT2, MAP4K1, ACTN4, LGALS7, LGALS4, SIRT2 | yes | no  |
| Amp136 | 19q13.2  | 44.51-44.59   | 0.08 | 1 | BRC96           | PAF1, ZFP36                                            | yes | no  |
| Amp137 | 19q13.2  | 44.62-45.05   | 0.43 | 1 | BRC96           | DYRK1B                                                 | yes | yes |
| Amp138 | 19q13.2  | 46.65-46.78   | 0.12 | 2 | BRC104, 148     |                                                        | yes | no  |
| Amp139 | 19q13.4  | 59.35-59.37   | 0.02 | 1 | BRC104          |                                                        | yes | no  |
| Amp140 | 19q13.42 | 60.81-60.82   | 0.01 | 1 | BRC104          |                                                        | yes | no  |
| Amp141 | 20p13    | 0.21-0.36     | 0.15 | 1 | BRC64           | TRIB3                                                  | no  | no  |
| Amp142 | 20p13    | 1.91-2.08     | 0.17 | 1 | BRC64           |                                                        | no  | no  |
| Amp143 | 20p13    | 2.41-2.59     | 0.18 | 1 | BRC64           |                                                        | no  | no  |
| Amp144 | 20p12.1  | 12.98-13.10   | 0.12 | 1 | BRC64           |                                                        | no  | no  |
| Amp145 | 20p12.1  | 14.96-17.41   | 2.46 | 1 | BRC104          | PCSK2                                                  | yes | yes |
| Amp146 | 20q13.13 | 48.94-49.01   | 0.07 | 1 | BRC74           | ADNP                                                   | yes | no  |
| Amp147 | 20q13.2  | 49.65-50.20   | 0.56 | 1 | BRC178          | SALL4                                                  | yes | no  |
| Amp148 | 20q13.33 | 62.04-62.08   | 0.03 | 1 | BRC82           |                                                        | yes | no  |
| Amp149 | 21q22.12 | 33.85-34.48   | 0.63 | 1 | BRC74           | SLC5A3                                                 | no  | no  |
| Amp150 | 21q22.3  | 38.68-39.47   | 0.80 | 1 | BRC74           | ERG                                                    | no  | yes |
| Amp151 | 21q22.3  | 42.59-42.85   | 0.26 | 1 | BRC74           | TFF3, TFF2, TFF1, Tmprss3                              | no  | no  |
| Amp152 | 21q22.3  | 44.49-45.05   | 0.56 | 1 | BRC74           | DNMT3L                                                 | no  | no  |
| Amp153 | 21q22.3  | 45.18-45.84   | 0.66 | 2 | BRC74, 104      | COL18A1, SLC19A1                                       | no  | yes |
| Amp154 | 21q22.3  | 46.37-46.84   | 0.47 | 2 | BRC74, 104      |                                                        | no  | no  |
| Amp155 | 22q13.1  | 34.49-34.92   | 0.43 | 2 | BRC57, 80       | APOL3                                                  | no  | no  |
| Amp156 | 22q13.2  | 39.96-40.09   | 0.12 | 1 | BRC185          |                                                        | no  | no  |
| Amp157 | 22q13.2  | 41.29-41.30   | 0.01 | 1 | BRC120          |                                                        | no  | yes |
| Amp158 | Xp11.21  | 55.67-56.33   | 0.66 | 1 | BRC117          | KLF8                                                   | yes | yes |
| HD1    | 4p14     | 37.13-37.29   | 0.16 | 1 | BRC130          |                                                        | yes | no  |
| HD2    | 4q21.23  | 85.71-86.67   | 0.86 | 1 | BRC64           | WDFY3                                                  | yes | yes |
| HD3    | 4q34     | 175.37-175.65 | 0.28 | 1 | BRC88           |                                                        | yes | no  |
| HD4    | 5q31.1   | 134.26-134.40 | 0.14 | 1 | BRC104          | PITX1                                                  | yes | no  |
| HD5    | 6q27     | 169.92-169.93 | 0.01 | 1 | BRC66           |                                                        | yes | no  |
| HD6    | 7q34     | 137.92-138.04 | 0.12 | 1 | BRC130          |                                                        | yes | no  |
| HD7    | 8p22-p23 | 10.62-10.74   | 0.12 | 3 | BRC82, 104, 189 | PINX1                                                  | yes | no  |
| HD8    | 8p23.1   | 11.00-11.14   | 0.14 | 1 | BRC104          |                                                        | yes | no  |
| HD9    | 8p22     | 11.89-15.67   | 3.78 | 1 | BRC104          | DLC1, TUSC3                                            | yes | yes |
| HD10   | 8p21     | 20.88-21.59   | 0.72 | 1 | BRC104          |                                                        | yes | yes |
| HD11   | 8p21     | 24.27-26.38   | 2.11 | 1 | BRC104          | GNRH1, BNIP3L                                          | yes | yes |
| HD12   | 8p21     | 28.27-29.27   | 1.00 | 1 | BRC104          | FZD3, EXTL3                                            | yes | no  |
| HD13   | 8p11.21  | 42.71-43.00   | 0.29 | 1 | BRC104          |                                                        | yes | no  |
| HD14   | 9p21     | 21.31-23.68   | 2.37 | 3 | BRC88, 119, 170 | IFNA2, IFNA1, MTAP, CDKN2A, CDKN2B                     | yes | yes |
| HD15   | 10q23    | 89.27-89.50   | 0.23 | 1 | BRC130          |                                                        | yes | no  |
| HD16   | 10q23.31 | 90.02-91.03   | 1.01 | 1 | BRC130          | ACTA2                                                  | yes | yes |
| HD17   | 11p15.4  | 7.67-7.80     | 0.13 | 1 | BRC175          |                                                        | no  | no  |
| HD18   | 11q13.5  | 76.49-76.60   | 0.11 | 1 | BRC148          |                                                        | yes | no  |
| HD19   | 12p13.2  | 10.98-11.04   | 0.06 | 1 | BRC117          |                                                        | yes | no  |
| HD20   | 13q14.3  | 47.88-49.25   | 1.37 | 1 | BRC98           | RB1, RCBTB2, ARL11, KPNA3                              | no  | no  |
| HD21   | 15q11.2  | 20.55-21.24   | 0.68 | 1 | BRC130          | NIPA2                                                  | no  | yes |
| HD22   | 15q11.2  | 22.77-23.13   | 0.36 | 1 | BRC130          | PAR1, UBE3A                                            | no  | no  |

|      |          |             |      |   |                                            |                        |     |     |
|------|----------|-------------|------|---|--------------------------------------------|------------------------|-----|-----|
| HD23 | 15q14    | 33.60-33.94 | 0.34 | 1 | BRC117                                     |                        | no  | yes |
| HD24 | 15q14    | 35.19-36.41 | 1.22 | 1 | BRC130                                     |                        | no  | yes |
| HD25 | 15q21.1  | 43.45-43.56 | 0.11 | 1 | BRC117                                     |                        | no  | no  |
| HD26 | 15q15    | 43.77-45.79 | 2.02 | 1 | BRC117                                     |                        | no  | yes |
| HD27 | 15q21.3  | 53.50-53.62 | 0.12 | 1 | BRC117                                     |                        | no  | no  |
| HD28 | 16q22.1  | 67.63-67.71 | 0.08 | 1 | BRC82                                      |                        | yes | no  |
| HD29 | 16q22.1  | 68.75-68.76 | 0.01 | 8 | BRC62, 64, 106, 110, 120, 160,<br>164, 189 | PDPR                   | yes | yes |
| HD30 | 17p13.2  | 6.42-6.49   | 0.06 | 1 | BRC120                                     | TXNL5                  | yes | no  |
| HD31 | 18q12.1  | 26.83-27.38 | 0.55 | 1 | BRC130                                     | DSC3, DSC2, DSC1, DSG3 | yes | yes |
| HD32 | 18q21.2  | 50.11-50.71 | 0.61 | 1 | BRC82                                      |                        | yes | yes |
| HD33 | 22q11.23 | 22.71-22.72 | 0.01 | 5 | BRC66, 114, 117, 145, 167                  | GSTT1                  | no  | yes |

Amp: amplification, HD: homozygous deletion.

\* Overlap with the Database of Genomic Variants (DGV) entries "Nov 2010" version.

† Overlap with CNV list identified from Koreans [35].



**Table S4.** Correlation between RARs and clinicopathologic features

|         |   | ER Negative | ER Positive | Total | P-value | FDR   |
|---------|---|-------------|-------------|-------|---------|-------|
| RAR-L4  | - | 21          | 11          | 32    | <0.001  | 0.015 |
|         | + | 2           | 14          | 16    |         |       |
|         |   | Stage I     | Stage II    | Total | P-value | FDR   |
| RAR-G14 | - | 10          | 20          | 30    | 0.035   | 0.403 |
|         | + | 1           | 17          | 18    |         |       |
| RAR-G15 | - | 10          | 20          | 30    | 0.035   | 0.403 |
|         | + | 1           | 17          | 18    |         |       |

**Table S5.** RARs in 48 breast cancers by molecular subtype

| RARs     | Chr | Cytoband      | Total frequency | Luminal A     | Luminal B    | HER2       | TNBC        |
|----------|-----|---------------|-----------------|---------------|--------------|------------|-------------|
| RAR-G1   | 1   | q21.1         | 48%             | 14/29 (48.3%) | 4/10 (40.0%) | 0/1 (0.0%) | 5/8 (62.5%) |
| RAR-G2   | 1   | q21.2-q21.3   | 50%             | 15/29 (51.7%) | 4/10 (40.0%) | 0/1 (0.0%) | 5/8 (62.5%) |
| RAR-G3   | 1   | q21.3-q23.1   | 48%             | 14/29 (48.3%) | 4/10 (40.0%) | 0/1 (0.0%) | 5/8 (62.5%) |
| RAR-G4   | 1   | q23.2-q23.3   | 48%             | 14/29 (48.3%) | 4/10 (40.0%) | 0/1 (0.0%) | 5/8 (62.5%) |
| RAR-G5   | 1   | q24.13        | 48%             | 14/29 (48.3%) | 5/10 (50.0%) | 0/1 (0.0%) | 4/8 (50.0%) |
| RAR-G6   | 6   | q12           | 38%             | 8/29 (27.6%)  | 6/10 (60.0%) | 0/1 (0.0%) | 4/8 (50.0%) |
| RAR-G7   | 8   | q24.13        | 50%             | 15/29 (51.7%) | 6/10 (60.0%) | 0/1 (0.0%) | 3/8 (37.5%) |
| RAR-G8   | 8   | q24.13-q24.21 | 50%             | 15/29 (51.7%) | 6/10 (60.0%) | 0/1 (0.0%) | 3/8 (37.5%) |
| RAR-G9   | 8   | q24.3         | 50%             | 13/29 (44.8%) | 7/10 (70.0%) | 0/1 (0.0%) | 4/8 (50.0%) |
| RAR-G10  | 8   | q24.3         | 50%             | 12/29 (41.4%) | 7/10 (70.0%) | 0/1 (0.0%) | 5/8 (62.5%) |
| RAR-G11  | 16  | p13.3         | 38%             | 12/29 (41.4%) | 3/10 (30.0%) | 0/1 (0.0%) | 3/8 (37.5%) |
| RAR-G12  | 16  | p11.2         | 40%             | 10/29 (34.5%) | 5/10 (50.0%) | 0/1 (0.0%) | 3/8 (37.5%) |
| RAR-G13* | 17  | q12           | 38%             | 7/29 (24.1%)  | 9/10 (90.0%) | 1/1 (100%) | 1/8 (12.5%) |
| RAR-G14  | 17  | q25.1         | 38%             | 10/29 (34.5%) | 3/10 (30.0%) | 0/1 (0.0%) | 5/8 (62.5%) |
| RAR-G15  | 17  | q25.3         | 38%             | 11/29 (37.9%) | 4/10 (40.0%) | 0/1 (0.0%) | 3/8 (37.5%) |
| RAR-G16  | 20  | q13.12        | 33%             | 10/29 (34.5%) | 2/10 (20.0%) | 0/1 (0.0%) | 4/8 (50.0%) |
| RAR-G17  | 20  | q13.33        | 31%             | 9/29 (31.0%)  | 3/10 (30.0%) | 0/1 (0.0%) | 3/8 (37.5%) |
| RAR-G18  | 20  | q13.33        | 31%             | 8/29 (27.6%)  | 5/10 (50.0%) | 0/1 (0.0%) | 2/8 (25.0%) |
| RAR-L1   | 8   | p23.1-p22     | 50%             | 15/29 (51.7%) | 5/10 (50.0%) | 0/1 (0.0%) | 4/8 (50.0%) |
| RAR-L2   | 8   | p22           | 48%             | 14/29 (48.3%) | 6/10 (60.0%) | 0/1 (0.0%) | 4/8 (50.0%) |
| RAR-L3   | 8   | p21.2         | 48%             | 13/29 (44.8%) | 6/10 (60.0%) | 0/1 (0.0%) | 4/8 (50.0%) |
| RAR-L4   | 16  | q23.1-q23.3   | 33%             | 13/29 (44.8%) | 1/10 (10.0%) | 0/1 (0.0%) | 2/8 (25.0%) |
| RAR-L5   | 17  | p13.1-p12     | 44%             | 14/29 (48.3%) | 5/10 (50.0%) | 0/1 (0.0%) | 2/8 (25.0%) |

\* $P = 1.77 \times 10^{-4}$  based on Fischer's exact test

**Table S6.** RAR combination rules associated with death events

| Rule for death event                          | Laplace accuracy |
|-----------------------------------------------|------------------|
| RAR-G1(+), RAR-G7(+), RAR-G12(+), RAR-G13(+)  | 0.83             |
| RAR-G5(-), RAR-G7(+), RAR-G12(+), RAR-G13(+)  | 0.80             |
| RAR-G5(-), RAR-G8(+), RAR-G12(+), RAR-G13(+)  | 0.80             |
| RAR-G5(-), RAR-G9(+), RAR-G12(+), RAR-G13(+)  | 0.80             |
| RAR-G5(-), RAR-G10(+), RAR-G12(+), RAR-G13(+) | 0.80             |
| RAR-G5(-), RAR-G11(+), RAR-G12(+), RAR-G13(+) | 0.75             |
| RAR-G5(-), RAR-G17(+), RAR-G12(+), RAR-G13(+) | 0.75             |
| RAR-G5(-), RAR-L5(+), RAR-G12(+), RAR-G13(+)  | 0.75             |

**Table S7.** Frequency of chromosomal arm changes in 48 breast cancers.

| Chr arm | Gains      | Losses     |  | Chr arm | Gains      | Losses     |
|---------|------------|------------|--|---------|------------|------------|
| 1p      | 8          | 0          |  | 13p     | 0          | 0          |
| 1q      | 23 (47.9%) | 0          |  | 13q     | 0          | 0          |
| 2p      | 0          | 6          |  | 14p     | 0          | 0          |
| 2q      | 0          | 9          |  | 14q     | 6          | 15 (31.3%) |
| 3p      | 0          | 11         |  | 15p     | 0          | 0          |
| 3q      | 9          | 0          |  | 15q     | 7          | 12         |
| 4p      | 6          | 9          |  | 16p     | 18 (37.5%) | 0          |
| 4q      | 0          | 12         |  | 16q     | 8          | 16 (33.3%) |
| 5p      | 10         | 0          |  | 17p     | 0          | 21 (43.8%) |
| 5q      | 6          | 14         |  | 17q     | 18 (37.5%) | 0          |
| 6p      | 11         | 0          |  | 18p     | 0          | 0          |
| 6q      | 18 (37.5%) | 13         |  | 18q     | 0          | 0          |
| 7p      | 7          | 0          |  | 19p     | 0          | 3          |
| 7q      | 9          | 7          |  | 19q     | 13         | 5          |
| 8p      | 7          | 23 (47.9%) |  | 20p     | 0          | 0          |
| 8q      | 24 (50.0%) | 0          |  | 20q     | 16         | 0          |
| 9p      | 0          | 10         |  | 21p     | 0          | 0          |
| 9q      | 8          | 0          |  | 21q     | 10         | 0          |
| 10p     | 0          | 0          |  | 22p     | 0          | 0          |
| 10q     | 0          | 11         |  | 22q     | 10         | 0          |
| 11p     | 0          | 12         |  | 23p     | 0          | 14         |
| 11q     | 9          | 14         |  | 23q     | 5          | 14         |
| 12p     | 10         | 11         |  | 24p     | 0          | 0          |
| 12q     | 8          | 0          |  | 24q     | 0          | 0          |

Note: Gray boxes represent frequent chromosomal arm changes (> 30%)
